# Supplementary material
Source: publisher site journal article supplement (https://www.dovepress.com/article/216606)
Supplement: Supplementary file 1 [file get_supplementary_file.php]

**Supplementary data**

**Supplementary Table S1** Statin intensity classificationsa

| **Statin** | **Daily Dose** | | | |
| --- | --- | --- | --- | --- |
| **Low Intensity** | **Moderate Intensity** | **High Intensity** | **Notes (Classification of Atypical Doses)** |
| Atorvastatin | <10 mg/day | 10 to <40 mg/day | ≥40 mg/day | 30 mg/day = moderate intensity |
| Fluvastatin | <80 mg/day | 80 mg/day | n/a | 10 mg/day = low intensity |
| Lovastatin | <40 mg/day | ≥40 mg/day | n/a | 10 mg/day = low intensity 80 mg/day = moderate intensity |
| Pitavastatin | <2 mg/day | ≥2 mg/day | n/a |  |
| Pravastatin | <40 mg/day | ≥40 mg/day | n/a | <10 mg/day = low intensity |
| Rosuvastatin | <5 mg/day | 5 to <20 mg/day | ≥20 mg/day | <5 mg/day = low intensity 15 mg/day = moderate intensity |
| Simvastatin | <20 mg/day | 20 to <80 mg/day | ≥80 mg/day | <20 mg/day = low intensity >40 to <80 mg/day = moderate intensity ≥80 mg/day = high intensity |

aIntensification rules:

1) An absolute increase in dosage of the same statin, leading to an increase in the intensity category (eg, atorvastatin 20 to 40 mg daily).

2) A patient who switched to a different drug of higher intensity (eg, atorvastatin 20 mg to simvastatin 80 mg daily).

3) A patient with a dosage increase for the same drug within the same intensity category was not considered intensification (eg, atorvastatin 10 to 20 mg daily).

**Supplementary Table S2** Attrition flow chart

**Abbreviations:** CE, continuous enrollment; FIA, Formulary Impact Analyzer; LDL-C, low-density lipoprotein cholesterol; LLT, lipid-lowering therapy; P+, PharMetrics Plus; PCSK9, proprotein convertase subtilisin/kexin type 9; PCSK9i, PCSK9 inhibitor.

**Supplementary Table S3** Baseline demographics at index: modified non–PCSK9 inhibitor LLT cohort by subgroup

|  | **Intensified statin regimen**  **(N=5,660)** | **Augmented with ezetimibe**  **(N=764)** | **Switched statins without intensification (N=5,921)** |
| --- | --- | --- | --- |
| **Demographics** | | | |
| Age, years |  |  |  |
| Mean (SD) | 64.0 (11.2) | 63.9 (10.1) | 64.1 (11.0) |
| Median | 64 | 64 | 64 |
| Age group, n (%) |  |  |  |
| 18-34 years | 28 (0.5) | 6 (0.8) | 49 (0.8) |
| 35-44 years | 217 (3.8) | 17 (2.2) | 185 (3.1) |
| 45-54 years | 866 (15.3) | 109 (14.3) | 847 (14.3) |
| 55-64 years | 1,760 (31.6) | 257 (33.6) | 1,925 (32.5) |
| ≥65 years | 2,760 (48.8) | 375 (49.1) | 2,915 (49.2) |
| Sex, n (%) |  |  |  |
| Men | 2,730 (48.2) | 421 (55.1) | 2,683 (45.3) |
| Women | 2,930 (51.8) | 343 (44.9) | 3,238 (54.7) |
| Geographic region, n (%) |  |  |  |
| Northeast | 1,261 (22.3) | 184 (24.8) | 1,475 (24.9) |
| Midwest | 526 (9.3) | 65 (8.5) | 518 (8.8) |
| South | 3,052 (53.9) | 424 (55.5) | 3,287 (55.5) |
| West | 821 (14.5) | 91 (11.9) | 641 (10.8) |
| Payer type, n (%) |  |  |  |
| Commercial | 3,176 (56.1) | 462 (60.5) | 3,334 (56.3) |
| Medicare | 2,192 (38.7) | 279 (36.5) | 2,303 (38.9) |
| Other | 295 (5.2) | 23 (3.0) | 284 (4.8) |

**Abbreviations:** LLT, lipid-lowering therapy; PCSK9, proprotein convertase subtilisin/kexin type 9.

**Supplementary Table S4** Baseline clinical characteristics, LLT use, LDL-C values, and cardiovascular risk at index: modified non–PCSK9 inhibitor LLT cohort by subgroup

|  | **Intensified statin regimen**  **(N=5,660)** | **Augmented with ezetimibe**  **(N=764)** | **Switched statins without intensification (N=5,921)** |
| --- | --- | --- | --- |
| **Clinical characteristics** | | | |
| CCI |  |  |  |
| Mean (SD) | 2.5 (2.7) | 2.7 (2.9) | 2.8 (2.9) |
| Median | 2 | 2 | 2 |
| ≥3 comorbidities, n (%) | 2,068 (36.5) | 322 (42.2) | 2,478 (41.9) |
| LLT use, n (%) | | | |
| Statin only | 5,479 (96.8) | 569 (74.5) | 5,686 (96.0) |
| High intensity | 5 (0.1) | 308 (40.3) | 1,543 (26.1) |
| Medium intensity | 3,486 (61.6) | 224 (29.3) | 4,007 (67.7) |
| Low intensity | 1,988 (35.1) | 37 (4.8) | 136 (2.3) |
| Statin + ezetimibe | 181 (3.2) | 195 (25.5) | 235 (4.0) |
| High intensity | 1 (<0.1) | 48 (6.3) | 79 (1.3) |
| Medium intensity | 128 (2.3) | 125 (16.4) | 150 (2.5) |
| Low intensity | 52 (0.9) | 22 (2.9) | 6 (0.1) |
| Index LDL-C, mg/dLa |  | | |
| Mean (SD) | 120.2 (35.6) | 115.4 (38.2) | 122.8 (39.1) |
| Median | 115 | 107 | 116 |
| LDL-C category, n (%) |  | | |
| 70-99 mg/dL | 1,864 (32.9) | 325 (42.5) | 1,999 (33.8) |
| 100-129 mg/dL | 1,808 (31.9) | 223 (29.2) | 1,652 (27.9) |
| 130-189 mg/dL | 1,737 (30.7) | 172 (22.5) | 1,909 (32.2) |
| >189 mg/dL | 251 (4.4) | 44 (5.8) | 361 (6.1) |
| Any ASCVD | 2,106 (37.2) | 400 (52.4) | 2,311 (39.0) |
| ACS (MI or UA) | 481 (8.5) | 111 (14.5) | 534 (9.0) |
| Stroke (IS or TIA) | 439 (7.8) | 66 (8.6) | 487 (8.2) |
| Coronary revascularization (PCI or CABG) | 463 (8.2) | 121 (15.8) | 488 (8.2) |
| Probable FH | 286 (5.1) | 49 (6.4) | 344 (5.8) |
| Comorbidities/risk factors |  |  |  |
| Type 2 diabetes mellitus | 2,913 (51.5) | 384 (50.3) | 3,157 (53.3) |
| Hypertension | 4,905 (86.7) | 690 (90.3) | 5,174 (87.4) |
| Smoking | 926 (16.4) | 134 (17.5) | 1,055 (17.8) |
| CKD (Stage 1-5) | 753 (13.3) | 102 (13.4) | 940 (15.9) |
| Heart failure | 586 (10.4) | 87 (11.4) | 684 (11.6) |
| At least 1 recent MACEb | 279 (4.9) | 66 (8.6) | 289 (4.9) |
| Myocardial infarction | 93 (1.6) | 26 (3.4) | 88 (1.5) |
| Unstable angina | 32 (0.6) | 11 (1.4) | 34 (0.6) |
| Revascularization | 153 (2.7) | 51 (6.7) | 172 (2.9) |
| Ischemic stroke | 71 (1.3) | 10 (1.3) | 61 (1.0) |

aTo convert from mg/dL to mmol/L, multiply by 0.02586.

bMeasured during the 2-year pre-index period using P+ or Dx claims (primary diagnoses from inpatient claims and any nonancillary diagnoses from emergency department or outpatient claims).

**Abbreviations:** ACS, acute coronary syndrome; ASCVD; atherosclerotic cardiovascular disease; CABG, coronary artery bypass graft; CCI, Charlson Comorbidity Index; CKD, chronic kidney disease; FH, familial hypercholesterolemia; IS, ischemic stroke; LDL-C, low-density lipoprotein cholesterol; LLT, lipid-lowering therapy; MACE, major cardiovascular event; MI, myocardial infarction; P+, PharMetrics Plus; PCI, percutaneous coronary intervention; PCSK9, proprotein convertase subtilisin/kexin type 9; TIA, transient ischemic attack; UA, unstable angina.
